# Supplementary material for: Weakly haemolytic variants of Brachyspira hyodysenteriae newly emerged in Europe belong to a distinct subclade with unique genetic properties
Source: Vet Res. 2019 Mar 7;50:21. doi: 10.1186/s13567-019-0639-x (PMC6407217; doi:10.1186/s13567-019-0639-x)
Supplement: Supplementary file 2 — Additional file 2. B. hyodysenteriae strain sequence information, assembly statistics and gene content. [file 13567_2019_639_MOESM2_ESM.xlsx]

## Sheet: Sheet1
Additional file 2. Brachyspira hyodysenteriae strain sequence information, assembly statistics and gene content.
Isolate	Genome size	CDS	rRNA	tRNA	GC%	Depth	Aligned Bases to WA1*	Reference bases (WA1*)	% Aligned Bases	Kraken Identification 1st Match	%
JR88_Germany	3421788	2745	3	36	29.2	219	2844344	3000694	94.79	Brachyspira hyodysenteriae	63.05
JR96_Germany	3362476	2720	3	36	28.6	105	2858842	3000694	95.27	Brachyspira hyodysenteriae	77.09
JR97_Germany	3149512	2699	3	34	29.1	37	2725654	3000694	90.83	Brachyspira hyodysenteriae	65.19
JR98_Germany	3203636	2698	3	34	29.1	105	2887953	3000694	96.24	Brachyspira hyodysenteriae	73.32
D28_Belgium	3142538	2704	3	34	30.7	170	2839610	3000694	94.63	Brachyspira hyodysenteriae	79.49
JR15_Germany	3100117	2681	3	35	31.9	77	2729710	3000694	90.97	Brachyspira hyodysenteriae	81.39
JR22_Germany	3171458	2736	3	35	30.8	51	2787251	3000694	92.89	Brachyspira hyodysenteriae	82.44
JR31_Germany	3201518	2718	3	34	31.1	54	2837878	3000694	94.57	Brachyspira hyodysenteriae	84.08
JR32_Germany	3219208	2728	3	34	30.3	49	2830295	3000694	94.32	Brachyspira hyodysenteriae	82.58
JR42_Germany	3126925	2726	3	34	30.6	56	2700859	3000694	90.01	Brachyspira hyodysenteriae	87.06
JR47_Germany	3121182	2706	3	36	33.5	133	2680792	3000694	89.34	Brachyspira hyodysenteriae	73.77
JR48_Germany	3106854	2700	3	34	33.1	89	2658651	3000694	88.6	Brachyspira hyodysenteriae	75.04
JR49_Germany	3086272	2700	3	34	32.9	68	2502896	3000694	83.41	Brachyspira hyodysenteriae	68.01
JR50_Germany	3091345	2713	3	36	32.1	82	2698968	3000694	89.94	Brachyspira hyodysenteriae	70.15
JR51_Germany	3099272	2714	3	34	32.1	80	2770963	3000694	92.34	Brachyspira hyodysenteriae	77.63
JR53_Germany	3080822	2696	3	38	32.2	49	2590888	3000694	86.34	Brachyspira hyodysenteriae	76.8
JR54_Germany	3437659	2807	3	36	33.1	61	2378250	3000694	79.26	Brachyspira hyodysenteriae	75.96
JR56_Germany	3066416	2652	3	35	32.8	56	2492022	3000694	83.05	Brachyspira hyodysenteriae	74.61
JR57_Germany	3031071	2617	3	35	33.6	81	2312664	3000694	77.07	Brachyspira hyodysenteriae	74.82
JR58_Germany	3077334	2668	3	34	32.3	61	2601941	3000694	86.71	Brachyspira hyodysenteriae	77.22
JR59_Germany	3088437	2690	3	34	30.6	43	2707906	3000694	90.24	Brachyspira hyodysenteriae	81.79
JR60_Germany	3087882	2683	3	34	33.3	78	2496504	3000694	83.2	Brachyspira hyodysenteriae	75.09
JR61_Germany	3124396	2709	3	36	32.5	69	2701021	3000694	90.01	Brachyspira hyodysenteriae	71.71
JR63_Germany	3058851	2655	3	34	31.1	52	2720614	3000694	90.67	Brachyspira hyodysenteriae	81.86
JR64_Germany	3118190	2711	3	34	31.9	74	2807770	3000694	93.57	Brachyspira hyodysenteriae	74.16
JR65_Germany	3101200	2703	3	34	32	74	2794335	3000694	93.12	Brachyspira hyodysenteriae	72.76
JR71_Germany	3431275	2733	3	34	28.3	132	2837825	3000694	94.57	Brachyspira hyodysenteriae	62.81
JR72_Germany	3174727	2727	3	34	28.1	116	2838949	3000694	94.61	Brachyspira hyodysenteriae	73.04
JR73_Germany	3121074	2682	3	36	27.9	114	2746210	3000694	91.52	Brachyspira hyodysenteriae	56.89
JR74_Germany	3124406	2678	3	34	27.6	76	2737649	3000694	91.23	Brachyspira hyodysenteriae	63.31
JR76_Germany	3096175	2681	3	34	28.7	106	2834674	3000694	94.47	Brachyspira hyodysenteriae	61.92
JR77_Germany	3516140	3117	3	35	29.8	42	2438566	3000694	81.27	Brachyspira hyodysenteriae	59.88
JR79_Germany	3109421	2676	3	34	28.2	90	2824864	3000694	94.14	Brachyspira hyodysenteriae	68.02
JR80_Germany	3118327	2684	3	34	28.3	141	2832885	3000694	94.41	Brachyspira hyodysenteriae	67.31
AWT2-4_Spain	3373594	2761	3	35	28.7	109	2867011	3000694	95.54	Brachyspira hyodysenteriae	75.21
AWT1-3_Germany	3319376	2665	4	35	30.1	32	2639516	3000694	87.96	Brachyspira hyodysenteriae	51.61
AWT1-5_Germany	3708952	2709	3	37	29.3	154	2838302	3000694	94.59	Brachyspira hyodysenteriae	63.59
AWT1-6_Germany	3285289	2681	3	36	28.9	103	2835181	3000694	94.48	Brachyspira hyodysenteriae	77.63
AWT1-7_Germany	5229331	2858	5	56	30.4	66	2825344	3000694	94.16	Brachyspira hyodysenteriae	60.1
* reference genome B. hyodysenteriae WA1 [12]
